# Supplementary material for: Uncertainty Assessment of Satellite Remote Sensing-based Evapotranspiration Estimates: A Systematic Review of Methods and Gaps
Source: Copernicus journal article supplement (doi:10.5194/egusphere-2023-725), 2023-04-25
Supplement: Supplementary file 1 [file egusphere-2023-725-supplement.pdf]

# Supplementary Information

Article Title: Uncertainty Assessment of Satellite Remote Sensing-based Evapotranspiration Estimates: A Systematic Review of Methods and Gaps

Authors: Bich Tran<sup>1,2</sup>, Johannes van der Kwast<sup>1</sup>, Solomon Seyoum<sup>1</sup>, Remko Uijlenhoet<sup>2</sup>, Graham Jewitt<sup>2,3</sup>, Marloes Mul<sup>1</sup>

<sup>1</sup>Land and Water Management Department, IHE Delft Institute for Water Education, Delft, 2611 AX, the Netherlands

<sup>2</sup>Department of Water Management, Delft University of Technology, Delft, 2628 CN, the Netherlands

<sup>3</sup>Water Resources and Ecosystems Department, IHE Delft Institute for Water Education, Delft, 2611 AX, the Netherlands

*Correspondence to:* Bich N. Tran (b.tran@un-ihe.org)

## Table of contents

|                                                                             |    |
|-----------------------------------------------------------------------------|----|
| Supplementary Notes .....                                                   | 2  |
| Annex 1: List of prior articles used to identify search term variants ..... | 2  |
| Annex 2: Bibliometric analyses of included articles.....                    | 5  |
| Supplementary Tables.....                                                   | 7  |
| References to supplementary material .....                                  | 14 |

## List of figures

|                                                                                                                                                                                                                                                                             |   |
|-----------------------------------------------------------------------------------------------------------------------------------------------------------------------------------------------------------------------------------------------------------------------------|---|
| Figure S1: The number of records from search query 1 which includes variants of “Remote sensing”, “evapotranspiration”, and “Uncertainty” search terms, and the proportion of records from query 1 over records from query 2 which excludes ‘Uncertainty’ search terms..... | 5 |
| Figure S2: Network of co-authors of included articles (N=601) and the average year of publication generated using VOSviewer software (Eck and Waltman, 2009).....                                                                                                           | 7 |

## List of tables

|                                                                                                                                                                        |    |
|------------------------------------------------------------------------------------------------------------------------------------------------------------------------|----|
| Table S1: The journals with the most included articles. ....                                                                                                           | 6  |
| Table S2: Focus of the previous literature reviews on RS-derived ET estimation and the uncertainty and validation of spatial data and RS-derived data in general ..... | 7  |
| Table S3: In situ methods to measure Evapotranspiration (ET) or Latent Heat Flux (LE). N/A: Not Applicable.....                                                        | 9  |
| Table S4: Metrics used for uncertainty assessment in the reviewed articles .....                                                                                       | 11 |

# Supplementary Notes

## Annex 1: List of prior articles used to identify search term variants

1. Badgley, G., Fisher, J.B., Jiménez, C., Tu, K.P., Vinukollu, R., 2015. On Uncertainty in Global Terrestrial Evapotranspiration Estimates from Choice of Input Forcing Datasets. *Journal of Hydrometeorology* 16, 1449–1455. <https://doi.org/10.1175/JHM-D-14-0040.1>
2. Bhattarai, N., Mallick, K., Stuart, J., Vishwakarma, B.D., Niraula, R., Sen, S., Jain, M., 2019. An automated multi-model evapotranspiration mapping framework using remotely sensed and reanalysis data. *Remote Sensing of Environment* 229, 69–92. <https://doi.org/10.1016/j.rse.2019.04.026>
3. Byun, K., Liaqat, U.W., Choi, M., 2014. Dual-model approaches for evapotranspiration analyses over homo- and heterogeneous land surface conditions. *Agricultural and Forest Meteorology* 197, 169–187. <https://doi.org/10.1016/j.agrformet.2014.07.001>
4. Chen, Y., Xia, J., Liang, S., Feng, J., Fisher, J.B., Li, Xin, Li, Xianglan, Liu, S., Ma, Z., Miyata, A., Mu, Q., Sun, L., Tang, J., Wang, K., Wen, J., Xue, Y., Yu, G., Zha, T., Zhang, L., Zhang, Q., Zhao, T., Zhao, L., Yuan, W., 2014. Comparison of satellite-based evapotranspiration models over terrestrial ecosystems in China. *Remote Sensing of Environment* 140, 279–293. <https://doi.org/10.1016/j.rse.2013.08.045>
5. Chen, Y., Yuan, W., Xia, J., Fisher, J.B., Dong, W., Zhang, X., Liang, S., Ye, A., Cai, W., Feng, J., 2015. Using Bayesian model averaging to estimate terrestrial evapotranspiration in China. *Journal of Hydrology* 528, 537–549. <https://doi.org/10.1016/j.jhydrol.2015.06.059>
6. Guillevic, P.C., Olioso, A., Hook, S.J., Fisher, J.B., Lagouarde, J.-P., Vermote, E.F., 2019. Impact of the Revisit of Thermal Infrared Remote Sensing Observations on Evapotranspiration Uncertainty—A Sensitivity Study Using AmeriFlux Data. *Remote Sensing* 11, 573. <https://doi.org/10.3390/rs11050573>
7. He, X., Xu, T., Xia, Y., Bateni, S.M., Guo, Z., Liu, S., Mao, K., Zhang, Y., Feng, H., Zhao, J., 2020. A Bayesian Three-Cornered Hat (BTCH) Method: Improving the Terrestrial Evapotranspiration Estimation. *Remote Sensing* 12, 878. <https://doi.org/10.3390/rs12050878>
8. Jiménez, C., Prigent, C., Mueller, B., Seneviratne, S.I., McCabe, M.F., Wood, E.F., Rossow, W.B., Balsamo, G., Betts, A.K., Dirmeyer, P.A., Fisher, J.B., Jung, M., Kanamitsu, M., Reichle, R.H., Reichstein, M., Rodell, M., Sheffield, J., Tu, K., Wang, K., 2011. Global intercomparison of 12 land surface heat flux estimates. *Journal of Geophysical Research: Atmospheres* 116. <https://doi.org/10.1029/2010JD014545>
9. Jung, H.C., Getirana, A., Arsenault, K.R., Holmes, T.R.H., McNally, A., 2019. Uncertainties in Evapotranspiration Estimates over West Africa. *Remote Sensing* 11, 892. <https://doi.org/10.3390/rs11080892>
10. Khan, M.S., Liaqat, U.W., Baik, J., Choi, M., 2018. Stand-alone uncertainty characterization of GLEAM, GLDAS and MOD16 evapotranspiration products using an extended triple collocation approach. *Agricultural and Forest Meteorology* 252, 256–268. <https://doi.org/10.1016/j.agrformet.2018.01.022>

11. Kiptala, J.K., Mohamed, Y., Mul, M.L., Van der Zaag, P., 2013. Mapping evapotranspiration trends using MODIS and SEBAL model in a data scarce and heterogeneous landscape in Eastern Africa. *Water Resources Research* 49, 8495–8510.  
<https://doi.org/10.1002/2013WR014240>
12. Li, Z., Jia, L., Lu, J., 2015. On Uncertainties of the Priestley-Taylor/LST-Fc Feature Space Method to Estimate Evapotranspiration: Case Study in an Arid/Semiarid Region in Northwest China. *Remote Sensing* 7, 447–466. <https://doi.org/10.3390/rs70100447>
13. Liu, W., Wang, L., Zhou, J., Li, Y., Sun, F., Fu, G., Li, X., Sang, Y.-F., 2016. A worldwide evaluation of basin-scale evapotranspiration estimates against the water balance method. *Journal of Hydrology* 538, 82–95. <https://doi.org/10.1016/j.jhydrol.2016.04.006>
14. Long, D., Longuevergne, L., Scanlon, B.R., 2014. Uncertainty in evapotranspiration from land surface modeling, remote sensing, and GRACE satellites. *Water Resources Research* 50, 1131–1151. <https://doi.org/10.1002/2013WR014581>
15. McCabe, M.F., Ershadi, A., Jimenez, C., Miralles, D.G., Michel, D., Wood, E.F., 2016. The GEWEX LandFlux project: evaluation of model evaporation using tower-based and globally gridded forcing data. *Geoscientific Model Development* 9, 283–305.  
<https://doi.org/10.5194/gmd-9-283-2016>
16. Mueller, B., Hirschi, M., Jimenez, C., Ciais, P., Dirmeyer, P.A., Dolman, A.J., Fisher, J.B., Jung, M., Ludwig, F., Maignan, F., Miralles, D.G., McCabe, M.F., Reichstein, M., Sheffield, J., Wang, K., Wood, E.F., Zhang, Y., Seneviratne, S.I., 2013. Benchmark products for land evapotranspiration: LandFlux-EVAL multi-data set synthesis. *Hydrology and Earth System Sciences* 17, 3707–3720. <https://doi.org/10.5194/hess-17-3707-2013>
17. Mueller, B., Seneviratne, S.I., Jimenez, C., Corti, T., Hirschi, M., Balsamo, G., Ciais, P., Dirmeyer, P., Fisher, J.B., Guo, Z., Jung, M., Maignan, F., McCabe, M.F., Reichle, R., Reichstein, M., Rodell, M., Sheffield, J., Teuling, A.J., Wang, K., Wood, E.F., Zhang, Y., 2011. Evaluation of global observations-based evapotranspiration datasets and IPCC AR4 simulations. *Geophysical Research Letters* 38. <https://doi.org/10.1029/2010GL046230>
18. Pan, S., Pan, N., Tian, H., Friedlingstein, P., Sitch, S., Shi, H., Arora, V.K., Haverd, V., Jain, A.K., Kato, E., Lienert, S., Lombardozzi, D., Nabel, J.E.M.S., Ottlé, C., Poulter, B., Zaehle, S., Running, S.W., 2020. Evaluation of global terrestrial evapotranspiration using state-of-the-art approaches in remote sensing, machine learning and land surface modeling. *Hydrology and Earth System Sciences* 24, 1485–1509. <https://doi.org/10.5194/hess-24-1485-2020>
19. Rajib, A., Merwade, V., Yu, Z., 2018. Rationale and Efficacy of Assimilating Remotely Sensed Potential Evapotranspiration for Reduced Uncertainty of Hydrologic Models. *Water Resources Research* 54, 4615–4637. <https://doi.org/10.1029/2017WR021147>
20. Ramoelo, A., Majoji, N., Mathieu, R., Jovanovic, N., Nickless, A., Dzikiti, S., 2014. Validation of Global Evapotranspiration Product (MOD16) using Flux Tower Data in the African Savanna, South Africa. *Remote Sensing* 6, 7406–7423.  
<https://doi.org/10.3390/rs6087406>

21. Rodell, M., McWilliams, E.B., Famiglietti, J.S., Beaudoin, H.K., Nigro, J., 2011. Estimating evapotranspiration using an observation based terrestrial water budget. *Hydrological Processes* 25, 4082–4092. <https://doi.org/10.1002/hyp.8369>
22. Ruhoff, A.L., Paz, A.R., Aragao, L.E.O.C., Mu, Q., Malhi, Y., Collischonn, W., Rocha, H.R., Running, S.W., 2013. Assessment of the MODIS global evapotranspiration algorithm using eddy covariance measurements and hydrological modelling in the Rio Grande basin. *Hydrological Sciences Journal* 58, 1658–1676. <https://doi.org/10.1080/02626667.2013.837578>
23. Senkondo, W., Munishi, S.E., Tumbo, M., Nobert, J., Lyon, S.W., 2019. Comparing Remotely-Sensed Surface Energy Balance Evapotranspiration Estimates in Heterogeneous and Data-Limited Regions: A Case Study of Tanzania’s Kilombero Valley. *Remote Sensing* 11, 1289. <https://doi.org/10.3390/rs11111289>
24. Sörensson, A.A., Ruscica, R.C., 2018. Intercomparison and Uncertainty Assessment of Nine Evapotranspiration Estimates Over South America. *Water Resources Research* 54, 2891–2908. <https://doi.org/10.1002/2017WR021682>
25. Vinukollu, R.K., Meynadier, R., Sheffield, J., Wood, E.F., 2011a. Multi-model, multi-sensor estimates of global evapotranspiration: climatology, uncertainties and trends. *Hydrological Processes* 25, 3993–4010. <https://doi.org/10.1002/hyp.8393>
26. Vinukollu, R.K., Wood, E.F., Ferguson, C.R., Fisher, J.B., 2011b. Global estimates of evapotranspiration for climate studies using multi-sensor remote sensing data: Evaluation of three process-based approaches. *Remote Sensing of Environment* 115, 801–823. <https://doi.org/10.1016/j.rse.2010.11.006>
27. Wang, S., Pan, M., Mu, Q., Shi, X., Mao, J., Brümmer, C., Jassal, R.S., Krishnan, P., Li, J., Black, T.A., 2015. Comparing Evapotranspiration from Eddy Covariance Measurements, Water Budgets, Remote Sensing, and Land Surface Models over Canada. *Journal of Hydrometeorology* 16, 1540–1560. <https://doi.org/10.1175/JHM-D-14-0189.1>
28. Westerhoff, R.S., 2015. Using uncertainty of Penman and Penman–Monteith methods in combined satellite and ground-based evapotranspiration estimates. *Remote Sensing of Environment* 169, 102–112. <https://doi.org/10.1016/j.rse.2015.07.021>
29. Xu, T., Guo, Z., Xia, Y., Ferreira, V.G., Liu, S., Wang, K., Yao, Y., Zhang, X., Zhao, C., 2019. Evaluation of twelve evapotranspiration products from machine learning, remote sensing and land surface models over conterminous United States. *Journal of Hydrology* 578, 124105. <https://doi.org/10.1016/j.jhydrol.2019.124105>
30. Yang, X., Yong, B., Ren, L., Zhang, Y., Long, D., 2017. Multi-scale validation of GLEAM evapotranspiration products over China via ChinaFLUX ET measurements. *International Journal of Remote Sensing* 38, 5688–5709. <https://doi.org/10.1080/01431161.2017.1346400>
31. Yang, Y., Long, D., Guan, H., Liang, W., Simmons, C., Batelaan, O., 2015. Comparison of three dual-source remote sensing evapotranspiration models during the MUSOEXE-12 campaign: Revisit of model physics: Two-source remote sensing ET model comparison. *Water Resour. Res.* 51, 3145–3165. <https://doi.org/10.1002/2014WR015619>

32. Yilmaz, M.T., Anderson, M.C., Zaitchik, B., Hain, C.R., Crow, W.T., Ozdogan, M., Chun, J.A., Evans, J., 2014. Comparison of prognostic and diagnostic surface flux modeling approaches over the Nile River basin: PROGNOSTIC AND DIAGNOSTIC MODELING OVER NILE. *Water Resour. Res.* 50, 386–408. <https://doi.org/10.1002/2013WR014194>
33. Yuan, W., Liu, S., Liang, S., Tan, Z., Liu, H., Young, C., 2012. Estimations of Evapotranspiration and Water Balance with Uncertainty over the Yukon River Basin. *Water Resour Manage* 26, 2147–2157. <https://doi.org/10.1007/s11269-012-0007-3>
34. Zeng, R., Cai, X., 2018. Hydrologic Observation, Model, and Theory Congruence on Evapotranspiration Variance: Diagnosis of Multiple Observations and Land Surface Models. *Water Resources Research* 54, 9074–9095. <https://doi.org/10.1029/2018WR022723>

## Annex 2: Bibliometric analyses of included articles

Figure S1 shows the increasing number of articles resulting from the search queries in from 2011 to 2021. The number of records increased from 171 in 2011 to 400 in 2021 (the last access: 21.9.2021). The proportion of records when including the variants of the ‘uncertainty’ search term was about 60% and did not change considerably with the years. This proportion indicates that “uncertainty” has been playing a stable and important role in the studies of remotely sensed evapotranspiration.

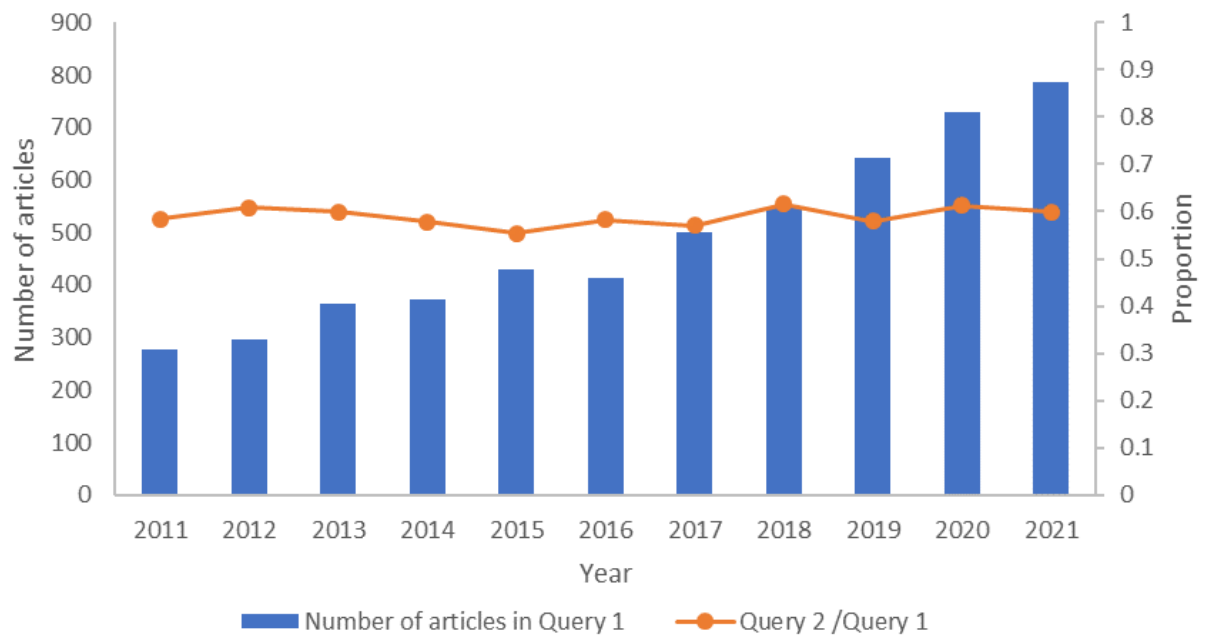

Figure S1: The number of records from search query 1 which includes variants of “Remote sensing”, “evapotranspiration”, and “Uncertainty” search terms, and the proportion of records from query 1 over records from query 2 which excludes ‘Uncertainty’ search terms.

The articles included in the quantitative synthesis were published in 134 journals. shows the journals with the most articles included. Altogether, these journals made up about 62% of the total articles. *Remote Sensing (MDPI)* ranked first with 101 articles (16.8% of the total, indicating that uncertainty in

RS-ET is discussed more in remote sensing than in agriculture and hydrology journals, which are the main fields where RS-ET is applied.

Table S1: The journals with the most included articles.

| No. | Journal                                                                          | Number of articles | % of all included articles |
|-----|----------------------------------------------------------------------------------|--------------------|----------------------------|
| 1   | Remote Sensing (MDPI)                                                            | 101                | 16.8%                      |
| 2   | Remote Sensing of Environment                                                    | 42                 | 7.0%                       |
| 3   | Agricultural and Forest Meteorology                                              | 36                 | 6.0%                       |
| 4   | Hydrology and Earth System Sciences                                              | 31                 | 5.2%                       |
| 5   | Journal of Hydrology                                                             | 31                 | 5.2%                       |
| 6   | International Journal of Remote Sensing                                          | 27                 | 4.5%                       |
| 7   | Agricultural Water Management                                                    | 26                 | 4.3%                       |
| 8   | Water Resources Research                                                         | 19                 | 3.2%                       |
| 9   | Water (MDPI)                                                                     | 15                 | 2.5%                       |
| 10  | Journal of Applied Remote Sensing                                                | 14                 | 2.3%                       |
| 11  | Hydrological Processes                                                           | 10                 | 1.7%                       |
| 12  | International Journal of Applied Earth Observation and Geoinformation            | 10                 | 1.7%                       |
| 13  | IEEE Journal of Selected Topics in Applied Earth Observations and Remote Sensing | 8                  | 1.3%                       |
| 14  | Hydrological Sciences Journal                                                    | 6                  | 1.0%                       |
| 15  | Advances in Meteorology                                                          | 5                  | 0.8%                       |
|     | <i>Other journals</i>                                                            |                    | 36.6%                      |

Figure S2 shows the co-author network of the included articles. The size of the circle represents the number of articles per author, with a threshold of at least 10 articles per author. The links represent the number of studies each collaborated in. Each cluster is often led by the first author of a particular RS-ET model. For example, Anderson M.C and Kustas W.P. have published mainly about ALEXI and TSEB models, Senay G.B. about SSEBop, Fisher J.B. about PT-JPL, and Miralles D.G. about GLEAM. The clusters of Yao Y., Zhang X., Chen X., and co-authors had more publications in later years (with an average publication year > 2017).

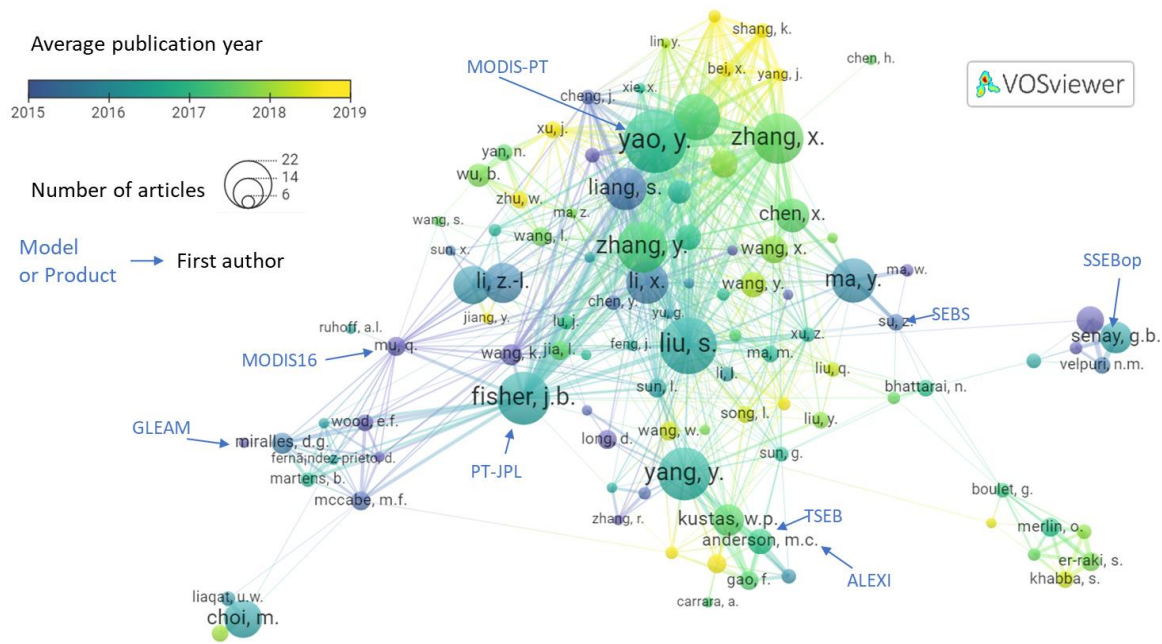

Figure S2: Network of co-authors of included articles (N=601) and the average year of publication generated using VOSviewer software (Eck and Waltman, 2009)

## Supplementary Tables

Table S2: Focus of the previous literature reviews on RS-derived ET estimation and the uncertainty and validation of spatial data and RS-derived data in general

| Topic                                         | References              | Focus of the review                                                                                                                                                                                                                                                                                 |
|-----------------------------------------------|-------------------------|-----------------------------------------------------------------------------------------------------------------------------------------------------------------------------------------------------------------------------------------------------------------------------------------------------|
| ET estimation methods based on satellite data | Kustas and Norman, 1996 | Describing techniques used in evaluating ET with remote sensing at hourly to daily time frame, with a summary of 16 model types.                                                                                                                                                                    |
|                                               | Courault et al., 2005   | Reviewing different approaches to estimate ET from remote sensing data and discussing the main physical bases and assumptions of various models, and proposing to classifying methods into 4 categories: empirical direct, residual of energy balance, deterministic, and vegetation index methods. |
|                                               | Gowda et al., 2007      | Reviewing 6 common remote sensing-based land surface energy balance algorithms for mapping regional ET and their limitations, data needs, knowledge gaps, and future opportunities and challenges with respect to agriculture.                                                                      |
|                                               | Kalma et al., 2008      | Reviewing methods for estimating evaporation from landscapes, regions, and larger geographic extents, with remotely sensed surface temperatures, and highlighting uncertainties and limitations associated with those estimation methods based on the results of 30 validation studies.             |
|                                               | Li et al., 2009         | Providing an overview of 10 commonly applied ET models using remotely sensed data in terms of theories, inputs, assumptions, the                                                                                                                                                                    |

|                                                                           |                          |                                                                                                                                                                                                                                                                                                                      |
|---------------------------------------------------------------------------|--------------------------|----------------------------------------------------------------------------------------------------------------------------------------------------------------------------------------------------------------------------------------------------------------------------------------------------------------------|
|                                                                           |                          | accuracy of results, and advantages and drawbacks of models.                                                                                                                                                                                                                                                         |
|                                                                           | Glenn et al., 2010       | Examining the role and utility of methods that use Vegetation Indices (VI) from satellites to estimate ET over a wide range of scales of measurements, discussing limitations and accuracy of these methods.                                                                                                         |
|                                                                           | Glenn et al., 2011       | Reviewing ground methods used to estimate local ET and remote sensing methods developed for regional and continental scales, also discussing sources of error or uncertainty inherent in the estimates, lessons learned from ET research in Australia                                                                |
|                                                                           | Senay et al., 2011       | Reviewing methods to estimate basin-scale ET, including satellite-based methods                                                                                                                                                                                                                                      |
|                                                                           | Wang and Dickinson, 2012 | Surveying the basic theories, observational methods, satellite algorithm and land surface models for terrestrial ET                                                                                                                                                                                                  |
|                                                                           | Liou and Kar, 2014       | Reviewing 6 common surface energy balance algorithms regarding their main assumptions, advantages and disadvantages.                                                                                                                                                                                                 |
|                                                                           | Zhang et al., 2016       | Summarizing the underlying theories, development history, advantages and limitations of 7 groups of remote sensing based evapotranspiration estimation methods                                                                                                                                                       |
|                                                                           | Mohan et al., 2020       | Summarizing approaches to estimate sensible heat flux in RS-ET models                                                                                                                                                                                                                                                |
|                                                                           | Chen and Liu, 2020       | Providing key milestones in history of remote sensing ET model development in 2 categories: temperature-based and conductance-based models                                                                                                                                                                           |
| Uncertainty and validation of spatial data and RS-derived data in general | Zeng et al., 2015        | Assessing how European initiatives approach the validation of Essential Climate Variables (ECVs) Climate Data Records (CDRs) with 3 examples of soil moisture, fAPAR and sea ice; discussing aspects of validation process and proposing a generic validation process for ECVs CDRs                                  |
|                                                                           | Mayr et al., 2019        | Reviewing validation of temporally dense time-series of land surface geo-information products that cover the continental to global scale, in terms of utilized validation data, validation methods, development trend.                                                                                               |
|                                                                           | Wu et al., 2019          | Reviewing the development of validation methodologies worldwide in terms of principles and approaches, recent progress of validation in China, the shortcomings of the current status of validation; providing outlook and forecasting development trend of validation                                               |
|                                                                           | Bielecka and Burek, 2019 | Providing a survey on spatial data quality and uncertainty research production in the last 30 years, highlighting that remote sensing and geography were the main research subject categories where quality and uncertainty are of greatest importance at all stages from data acquisition to information retrieval. |
|                                                                           | Bayat et al., 2021       | Investigating level of readiness for operation validation of 7 global long-term satellite-based terrestrial ECVs including ET                                                                                                                                                                                        |



|                                          |                               |                                                                                                                                                                                                                                                  |
|------------------------------------------|-------------------------------|--------------------------------------------------------------------------------------------------------------------------------------------------------------------------------------------------------------------------------------------------|
| Uncertainty or accuracy of ET estimation | Allen et al., 2011a           | Describing common ET measuring systems including <i>in situ</i> and remote sensing techniques, and the sources and typical range of their errors.                                                                                                |
|                                          | Allen et al., 2011b           | Providing recommendations for documentation and description of information that should accompany ET estimates reported in ET-related articles.                                                                                                   |
|                                          | Karimi and Bastiaanssen, 2015 | Reviewing the reliability of remote sensing algorithms to accurately determine the spatial distribution of ET (and rainfall and land use) by synthesizing mean error of seasonal ET reported in 31 papers that use remote sensing ET algorithms. |

Table S3: *In situ* methods to measure Evapotranspiration (ET) or Latent Heat Flux (LE). N/A: Not Applicable

| Method                            | Instruments                                                                                                             | Measurement                                                                             | Intermediate calculations                                                               | Method to derive ET or LE                                                                                                       |
|-----------------------------------|-------------------------------------------------------------------------------------------------------------------------|-----------------------------------------------------------------------------------------|-----------------------------------------------------------------------------------------|---------------------------------------------------------------------------------------------------------------------------------|
| Eddy covariance (EC)              | Infrared Gas Analyser (IRGA)                                                                                            | Water vapor concentration                                                               | Calculation of mixing ratio of water vapor and dry air                                  | Derivation of LE from eddy covariance using Reynolds averaging (Foken et al., 2012; Montgomery, 1948)                           |
|                                   | Sonic anemometer                                                                                                        | 3-direction wind speed                                                                  | Calculation of covariance of vertical wind velocity and mixing ratio                    |                                                                                                                                 |
| Lysimetry                         | Weighing lysimeter, Drainage lysimeter or Soil water content sensor (e.g. neutron probe)                                | Soil weight or Soil water content                                                       | Calculation of change in soil water storage                                             | Derivation of ET as residual of soil water balance (e.g., Teuling, 2018)                                                        |
|                                   | Rain gauge                                                                                                              | Rainfall                                                                                | Calculation of water inflow                                                             |                                                                                                                                 |
|                                   | Flow meter                                                                                                              | Irrigation                                                                              |                                                                                         |                                                                                                                                 |
| Scintillometry                    | Large Aperture Scintillometer (LAS) <ul style="list-style-type: none"> <li>- Transmitter</li> <li>- Detector</li> </ul> | Log-variance of the intensity variations of the received light beam signals             | Calculation of structure parameters of refractive index, temperature, specific humidity | Derivation of sensible heat (H) and Latent heat flux (LE) based on Monin-Obukhov Similarity Theory (Frehlich, 1992; Hill, 1997) |
|                                   | Temperature probe                                                                                                       | Air temperature at different heights                                                    | Determination of sensible heat (H) direction based on temperature gradient              |                                                                                                                                 |
| Bowen ratio energy balance (BREB) | Temperature probe, Relative humidity probe, Barometer                                                                   | Gradient of atmospheric temperature, air moisture content (actual water vapor pressure) | Calculation of Bowen ratio                                                              | Derivation of H and LE from Bowen ratio and surface energy balance                                                              |

|                         |                                                                              |                                                                                    |                                                                                      |                                                                                        |
|-------------------------|------------------------------------------------------------------------------|------------------------------------------------------------------------------------|--------------------------------------------------------------------------------------|----------------------------------------------------------------------------------------|
|                         | Net radiometer, Wind speed and direction sensor                              | Net radiation                                                                      | Calculation of sum of H and LE from surface energy balance equation                  |                                                                                        |
|                         | Soil heat flow plates, Soil moisture probe                                   | Soil heat flux                                                                     |                                                                                      |                                                                                        |
| Surface renewal (SR)    | Fine-wire thermocouple                                                       | High frequency temperature fluctuation                                             | Calculation of sensible heat (H) based on a solution of the scalar conservation      | Derivation of LE as residual of surface energy balance (Paw U et al., 1995)            |
|                         | Net radiometer, Wind speed and direction sensor                              | Net radiation                                                                      | Calculation of sum of H and LE from surface energy balance equation                  |                                                                                        |
|                         | Soil heat flow plates, Soil moisture probe                                   | Soil heat flux                                                                     |                                                                                      |                                                                                        |
| Advection-aridity (AA)  | Anemometer<br>Pressure sensor<br>Thermometer<br>Hygrometer                   | Windspeed<br>Air pressure<br>Air temperature<br>Relative humidity                  | Calculation of wet surface ET (P-T), potential ET (Penman), and relative evaporation | Derivation of ET based on complementary relationship (Brutsaert and Stricker, 1979)    |
| Combinatory method (CM) | Anemometer<br>Pressure sensor<br>Thermometer<br>Hygrometer                   | Windspeed<br>Air pressure<br>Air temperature<br>Relative humidity                  | Calculation of LE and H without stability correction                                 | Derivation of LE using stability correction (Thom et al., 1975; Zhong et al., 2019)    |
|                         | Temperature probe, Net radiometer                                            | Net radiation<br>Soil heat flux                                                    | Calculation of stability function                                                    |                                                                                        |
| FAO-56 Crop coefficient | Net radiometer<br>Anemometer<br>Pressure sensor<br>Thermometer<br>Hygrometer | Net radiation<br>Windspeed<br>Air pressure<br>Air temperature<br>Relative humidity | Calculation of FAO-56 potential ET for reference crop                                | Derivation of ET using crop coefficients (*need crop information) (Allen et al., 1998) |
| Evaporation pan         | Class A pan                                                                  | Depth of water                                                                     | Calculation of evaporation of open water                                             | N/A                                                                                    |
| Sap flow                | Thermal dissipation probe                                                    | Movement of xylem sap                                                              | Calculation of plant transpiration (Lu et al., 2004)                                 | N/A                                                                                    |

Table S4: Metrics used for uncertainty assessment in the reviewed articles.

| Name                                                                                | Formula                                                                                                                                                                 | Unit              | Best value |
|-------------------------------------------------------------------------------------|-------------------------------------------------------------------------------------------------------------------------------------------------------------------------|-------------------|------------|
| Standard deviation ( $\sigma_y$ )                                                   | $\sigma_y = \sqrt{\frac{1}{N} \sum_{i=1}^N (y_i - \bar{y})^2}$                                                                                                          | Unit of x         | 0          |
| Variance ( $\sigma_y^2$ )                                                           | $\sigma_y^2 = \frac{1}{N} \sum_{i=1}^N (y_i - \bar{y})^2$                                                                                                               | Squared unit of x | 0          |
| Mean error (ME), Mean bias error (MBE), Bias                                        | $ME = \frac{1}{N} \sum_{i=1}^N y_i - x_i$                                                                                                                               | Unit of x         | 0          |
| Relative error (RE) or Mean error percentage (MEP) or Percent Bias (PBIAS)          | $MEP = \frac{ME}{\bar{x}} \times 100$                                                                                                                                   | %                 | 0          |
| Normalized mean bias (NMB)                                                          | $NMB = \frac{ME}{\sigma_x}$                                                                                                                                             | -                 | 0          |
| Mean absolute error (MAE) or Mean absolute difference (MAD)                         | $MAE = \frac{1}{N} \sum_{i=1}^N  x_i - y_i $                                                                                                                            | Unit of x         | 0          |
| Mean absolute percentage error (MAPE) or Mean absolute percentage difference (MAPD) | $MAPE = \frac{MAE}{\bar{x}} \times 100$                                                                                                                                 | %                 | 0          |
| Pearson's coefficient of correlation ( $\rho$ )                                     | $\rho = \frac{cov(x, y)}{\sigma_x \sigma_y} = \frac{\sum_{i=1}^N (x_i - \bar{x})(y_i - \bar{y})}{\sqrt{\sum_{i=1}^N (x_i - \bar{x})^2 \sum_{i=1}^N (y_i - \bar{y})^2}}$ | -                 | 1          |
| Regression coefficient: slope $a$                                                   | $a = \frac{N \sum_{i=1}^N (x_i y_i) \sum_{i=1}^N (x_i) \sum_{i=1}^N (y_i)}{N \sum_{i=1}^N (x_i)^2 (\sum_{i=1}^N (x_i))^2}$                                              | -                 | 1          |
| Regression coefficient: intercept $b$                                               | $b = \frac{\sum_{i=1}^N (y_i) \sum_{i=1}^N (x_i)^2 - \sum_{i=1}^N (x_i) \sum_{i=1}^N (x_i y_i)}{N \sum_{i=1}^N (x_i)^2 (\sum_{i=1}^N (x_i))^2}$                         | -                 | 0          |
| Coefficient of determination ( $R^2$ )                                              | $R_1^2 = 1 - \frac{\sum_{i=1}^N (y_i - x_i)^2}{\sum_{i=1}^N (x_i - \bar{x})^2}$                                                                                         | -                 | 1          |

|                                    |                                                                                                                                                                                  |                   |   |
|------------------------------------|----------------------------------------------------------------------------------------------------------------------------------------------------------------------------------|-------------------|---|
|                                    | $R_2^2 = \frac{\sum_{i=1}^N (y_i - \bar{x})^2}{\sum_{i=1}^N (x_i - \bar{x})^2}$                                                                                                  | -                 | 1 |
|                                    | $R_6^2 = \rho^2 = \frac{\sum_{i=1}^N (x_i - \bar{x})^2 (y_i - \bar{y})^2}{\sum_{i=1}^N (x_i - \bar{x})^2 \sum_{i=1}^N (y_i - \bar{y})^2}$                                        | -                 | 1 |
|                                    | $R_7^2 = 1 - \frac{\sum_{i=1}^N (y_i - x_i)^2}{\sum_{i=1}^N (x_i)^2}$                                                                                                            | -                 | 1 |
| Mean squared error (MSE)           | $MSE = \frac{1}{N} \sum_{i=1}^N (y_i - x_i)^2$                                                                                                                                   | Unit of x         | 0 |
| Systematic MSE                     | $MSE_s = \frac{1}{N} \sum_{i=1}^N (\hat{y}_i - x_i)^2$<br>Where<br>$\hat{y}_i$ : estimate of $y_i$ based on the ordinary least-squares regression $\hat{y}_i = a + bx_i$         | Squared unit of x | 0 |
| Unsystematic MSE                   | $MSE_u = \frac{1}{N} \sum_{i=1}^N (\hat{y}_i - y_i)^2$<br>Where<br>$\hat{y}_i$ : estimate of $y_i$ based on the ordinary least-squares regression $\hat{y}_i = a + bx_i$         | Squared unit of x | 0 |
| Root mean squared error (RMSE)     | $RMSE = \sqrt{\frac{1}{N} \sum_{i=1}^N (y_i - x_i)^2}$                                                                                                                           | Unit of x         | 0 |
| Systematic RMSE                    | $RMSE_s = \sqrt{\frac{1}{N} \sum_{i=1}^N (\hat{y}_i - x_i)^2}$<br>Where<br>$\hat{y}_i$ : estimate of $y_i$ based on the ordinary least-squares regression $\hat{y}_i = a + bx_i$ | Unit of x         | 0 |
| Unsystematic RMSE                  | $RMSE_u = \sqrt{\frac{1}{N} \sum_{i=1}^N (\hat{y}_i - y_i)^2}$<br>Where<br>$\hat{y}_i$ : estimate of $y_i$ based on the ordinary least-squares regression $\hat{y}_i = a + bx_i$ | Unit of x         | 0 |
| Normalized RMSE or fractional RMSE | $RMSE_n = \frac{RMSE}{\sigma_x}$                                                                                                                                                 | -                 | 0 |
| Relative RMSE                      | $RMSE_r = \frac{RMSE}{\bar{x}} \times 100$                                                                                                                                       | %                 | 0 |
| Centered or Unbiased RMSE          | $RMSE_c = \sqrt{\frac{1}{N} \sum_{i=1}^N [(x_i - \bar{x}) - (y_i - \bar{y})]^2}$                                                                                                 | Unit of x         | 0 |

|                                       |                                                                                                                                                                                                                                                                                     |                 |   |
|---------------------------------------|-------------------------------------------------------------------------------------------------------------------------------------------------------------------------------------------------------------------------------------------------------------------------------------|-----------------|---|
| Coefficient of variation (CV)         | $CV_y = \frac{\sigma_y}{\bar{y}}$                                                                                                                                                                                                                                                   | -               |   |
| Nash-Sutcliffe Efficiency (NSE)       | $NSE = 1 - \frac{\sum_{i=1}^N (x_i - y_i)^2}{\sum_{i=1}^N (x_i - \bar{x})^2}$                                                                                                                                                                                                       | -               | 1 |
| Index of agreement ( $d_2$ )          | $d_2 = 1 - \frac{\sum_{i=1}^N \omega_i (y_i - x_i)^2}{\sum_{i=1}^N \omega_i ( y_i - \bar{y}  +  x_i - \bar{x} )^2}$<br>$\omega_i$ : irregularly weight that represent relative size of the $i^{\text{th}}$ interval or cell size.                                                   | -               | 1 |
| Modified index of agreement ( $d_1$ ) | $d_1 = 1 - \frac{\sum_{i=1}^N \omega_i  y_i - x_i }{\sum_{i=1}^N \omega_i ( y_i - \bar{y}  +  x_i - \bar{x} )}$<br>$\omega_i$ : irregularly weight that represent relative size of the $i^{\text{th}}$ interval or cell size.                                                       | -               | 1 |
| Taylor skill score (TSC)              | $TSC = \frac{4(1 + \rho)}{\left(\hat{\sigma}_f + \frac{1}{\hat{\sigma}_f}\right)^2 (1 + \rho_0)}$<br>Where<br>$\hat{\sigma}_f = \frac{\sigma_y}{\sigma_x}$<br>$\rho_0$ : Maximum attainable correlation ( $\hat{\sigma}_f \rightarrow 1, \rho \rightarrow \rho_0$ )                 | -               | 4 |
| Kling-Gupta Efficiency (KGE)          | $KGE = 1 - \sqrt{(\rho - 1)^2 + \left(\frac{\sigma_y}{\sigma_x} - 1\right)^2 + \left(\frac{\bar{y}}{\bar{x}} - 1\right)^2}$                                                                                                                                                         | -               | 1 |
| Standard error (SE)                   | $SE = \sqrt{\frac{\sum_{i=1}^N (x_i - y_i)^2}{N - 1}}$                                                                                                                                                                                                                              | Unit of x and y | 0 |
| Similarity index ( $\Omega$ )         | $\Omega = \frac{m\sigma_b^2 - \sigma^2}{(m - 1)\sigma^2}$<br>Where<br>$m$ : number of ensemble members<br>$\sigma^2$ : total variance of all members concatenated<br>$\sigma_b^2$ : variance of the time series that results from calculating the ensemble mean of each time step   | -               | 1 |
| Spatial Efficiency (SPAEF)            | $SPAEF = 1 - \sqrt{(\rho - 1)^2 + \left(\frac{CV_y}{CV_x} - 1\right)^2 + (\gamma - 1)^2}$<br>$\gamma = \frac{\sum_{i=1}^N \min(K_i, L_i)}{\sum_{i=1}^N K_i}$<br>Where<br>$\gamma$ : histogram matching term<br>$K$ : histogram of reference map<br>$L$ : histogram of simulated map | -               | 1 |
| Median symmetric accuracy (MSA)       | $MSA = 100(e^{M(l(Q))} - 1)$<br>Where<br>M: median of the data<br>$Q = \frac{y}{x}$                                                                                                                                                                                                 | %               | 0 |

|                              |                                                                                                                                                                                                                                                                                                                                                                                                                                                                                                                                       |   |   |
|------------------------------|---------------------------------------------------------------------------------------------------------------------------------------------------------------------------------------------------------------------------------------------------------------------------------------------------------------------------------------------------------------------------------------------------------------------------------------------------------------------------------------------------------------------------------------|---|---|
| Degree correlation ( $r_l$ ) | $r_l = \frac{1}{\eta} \sum_{m=0}^l (C_{A_{lm}} C_{B_{lm}} + S_{A_{lm}} S_{B_{lm}})$ $\eta = \sqrt{\sum_{m=0}^l (C_{A_{lm}}^2 + S_{A_{lm}}^2)} \sqrt{\sum_{m=0}^l (C_{B_{lm}}^2 + S_{B_{lm}}^2)}$ <p>Where<br/> <math>C_{A_{lm}}</math> and <math>S_{A_{lm}}</math> are spherical harmonic coefficients of degree <math>l</math> and order <math>m</math> of dataset A<br/> <math>C_{B_{lm}}</math> and <math>S_{B_{lm}}</math> are spherical harmonic coefficients of degree <math>l</math> and order <math>m</math> of dataset B</p> | - | 1 |
|------------------------------|---------------------------------------------------------------------------------------------------------------------------------------------------------------------------------------------------------------------------------------------------------------------------------------------------------------------------------------------------------------------------------------------------------------------------------------------------------------------------------------------------------------------------------------|---|---|

## References to supplementary material

- Allen, R.G., Pereira, L.S., Howell, T.A., Jensen, M.E., 2011a. Evapotranspiration information reporting: I. Factors governing measurement accuracy. *Agric. Water Manag.* 98, 899–920. <https://doi.org/10.1016/j.agwat.2010.12.015>
- Allen, R.G., Pereira, L.S., Howell, T.A., Jensen, M.E., 2011b. Evapotranspiration information reporting: II. Recommended documentation. *Agric. Water Manag.* 98, 921–929. <https://doi.org/10.1016/j.agwat.2010.12.016>
- Allen, R.G., Pereira, L.S., Raes, D., Smith, M., 1998. Crop evapotranspiration - Guidelines for computing crop water requirements - FAO Irrigation and drainage paper 56. FAO - Food and Agriculture Organization of the United Nations, Rome.
- Bayat, B., Camacho, F., Nickeson, J., Cosh, M., Bolten, J., Vereecken, H., Montzka, C., 2021. Toward operational validation systems for global satellite-based terrestrial essential climate variables. *Int. J. Appl. Earth Obs. Geoinformation* 95, 102240. <https://doi.org/10.1016/j.jag.2020.102240>
- Bielecka, E., Burek, E., 2019. Spatial data quality and uncertainty publication patterns and trends by bibliometric analysis. *Open Geosci.* 11, 219–235. <https://doi.org/10.1515/geo-2019-0018>
- Brutsaert, W., Stricker, H., 1979. An advection-aridity approach to estimate actual regional evapotranspiration. *Water Resour. Res.* 15, 443–450. <https://doi.org/10.1029/WR015i002p00443>
- Chen, J.M., Liu, J., 2020. Evolution of evapotranspiration models using thermal and shortwave remote sensing data. *Remote Sens. Environ.* 237, 111594. <https://doi.org/10.1016/j.rse.2019.111594>
- Courault, D., Seguin, B., Olioso, A., 2005. Review on estimation of evapotranspiration from remote sensing data: From empirical to numerical modeling approaches. *Irrig. Drain. Syst.* 19, 223–249. <https://doi.org/10.1007/s10795-005-5186-0>
- Eck, N. van, Waltman, L., 2009. Software survey: VOSviewer, a computer program for bibliometric mapping. *Scientometrics* 84, 523–538. <https://doi.org/10.1007/s11192-009-0146-3>
- Foken, T., Aubinet, M., Leuning, R., 2012. The Eddy Covariance Method, in: Aubinet, M., Vesala, T., Papale, D. (Eds.), *Eddy Covariance: A Practical Guide to Measurement and Data Analysis*, Springer Atmospheric Sciences. Springer Netherlands, Dordrecht, pp. 1–19. [https://doi.org/10.1007/978-94-007-2351-1\\_1](https://doi.org/10.1007/978-94-007-2351-1_1)
- Frehlich, R., 1992. Laser Scintillation Measurements of the Temperature Spectrum in the Atmospheric Surface Layer. *J. Atmospheric Sci.* 49, 1494–1509. [https://doi.org/10.1175/1520-0469\(1992\)049<1494:LSMOTT>2.0.CO;2](https://doi.org/10.1175/1520-0469(1992)049<1494:LSMOTT>2.0.CO;2)
- Glenn, E.P., Doody, T.M., Guerschman, J.P., Huete, A.R., King, E.A., McVicar, T.R., Dijk, A.I.J.M.V., Niel, T.G.V., Yebra, M., Zhang, Y., 2011. Actual evapotranspiration estimation by ground and remote sensing methods: the Australian experience. *Hydrol. Process.* 25, 4103–4116. <https://doi.org/10.1002/hyp.8391>

- Glenn, E.P., Nagler, P.L., Huete, A.R., 2010. Vegetation Index Methods for Estimating Evapotranspiration by Remote Sensing. *Surv. Geophys.* 31, 531–555. <https://doi.org/10.1007/s10712-010-9102-2>
- Gowda, P.H., Chávez, J.L., Colaizzi, P.D., Evett, S.R., Howell, T.A., Tolk, J.A., 2007. Remote sensing based energy balance algorithms for mapping ET: Current status and future challenges. *Trans. ASABE* 50, 1639–1644.
- Hill, R.J., 1997. Algorithms for Obtaining Atmospheric Surface-Layer Fluxes from Scintillation Measurements. *J. Atmospheric Ocean. Technol.* 14, 456–467. [https://doi.org/10.1175/1520-0426\(1997\)014<0456:AFOASL>2.0.CO;2](https://doi.org/10.1175/1520-0426(1997)014<0456:AFOASL>2.0.CO;2)
- Kalma, J.D., McVicar, T.R., McCabe, M.F., 2008. Estimating Land Surface Evaporation: A Review of Methods Using Remotely Sensed Surface Temperature Data. *Surv. Geophys.* 29, 421–469. <https://doi.org/10.1007/s10712-008-9037-z>
- Karimi, P., Bastiaanssen, W.G.M., 2015. Spatial evapotranspiration, rainfall and land use data in water accounting &ndash; Part 1: Review of the accuracy of the remote sensing data. *Hydrol. Earth Syst. Sci.* 19, 507–532. <https://doi.org/10.5194/hess-19-507-2015>
- Kustas, W.P., Norman, J.M., 1996. Use of remote sensing for evapotranspiration monitoring over land surfaces. *Hydrol. Sci. J.* 41, 495–516. <https://doi.org/10.1080/02626669609491522>
- Li, Z.-L., Tang, R., Wan, Z., Bi, Y., Zhou, C., Tang, B., Yan, G., Zhang, X., 2009. A Review of Current Methodologies for Regional Evapotranspiration Estimation from Remotely Sensed Data. *Sensors* 9, 3801–3853. <https://doi.org/10.3390/s90503801>
- Liou, Y.-A., Kar, S.K., 2014. Evapotranspiration Estimation with Remote Sensing and Various Surface Energy Balance Algorithms—A Review. *Energies* 7, 2821–2849. <https://doi.org/10.3390/en7052821>
- Lu, P., Urban, L., Zhao, P., 2004. Granier’s thermal dissipation probe (TDP) method for measuring sap flow in trees: Theory and practice. *Acta Bot. Sin.* 46, 631–646.
- Mayr, S., Kuenzer, C., Gessner, U., Klein, I., Rutzinger, M., 2019. Validation of Earth Observation Time-Series: A Review for Large-Area and Temporally Dense Land Surface Products. *Remote Sens.* 11, 2616. <https://doi.org/10.3390/rs11222616>
- Mohan, M.M.P., Kanchirapuzha, R., Varma, M.R.R., 2020. Review of approaches for the estimation of sensible heat flux in remote sensing-based evapotranspiration models. *J. Appl. Remote Sens.* 14, 041501. <https://doi.org/10.1117/1.JRS.14.041501>
- Montgomery, R.B., 1948. Vertical Eddy Flux of Heat in the Atmosphere. *J. Atmospheric Sci.* 5, 265–274. [https://doi.org/10.1175/1520-0469\(1948\)005<0265:VEFOHI>2.0.CO;2](https://doi.org/10.1175/1520-0469(1948)005<0265:VEFOHI>2.0.CO;2)
- Paw U, K.T., Qiu, J., Su, H.-B., Watanabe, T., Brunet, Y., 1995. Surface renewal analysis: a new method to obtain scalar fluxes. *Agric. For. Meteorol.* 74, 119–137. [https://doi.org/10.1016/0168-1923\(94\)02182-J](https://doi.org/10.1016/0168-1923(94)02182-J)
- Senay, G.B., Leake, S., Nagler, P.L., Artan, G., Dickinson, J., Cordova, J.T., Glenn, E.P., 2011. Estimating basin scale evapotranspiration (ET) by water balance and remote sensing methods. *Hydrol. Process.* 25, 4037–4049. <https://doi.org/10.1002/hyp.8379>
- Teuling, A.J., 2018. A Forest Evapotranspiration Paradox Investigated Using Lysimeter Data. *Vadose Zone J.* 17, 170031. <https://doi.org/10.2136/vzj2017.01.0031>
- Thom, A.S., Stewart, J.B., Oliver, H.R., Gash, J.H.C., 1975. Comparison of aerodynamic and energy budget estimates of fluxes over a pine forest. *Q. J. R. Meteorol. Soc.* 101, 93–105. <https://doi.org/10.1002/qj.49710142708>
- Wang, K., Dickinson, R.E., 2012. A review of global terrestrial evapotranspiration: Observation, modeling, climatology, and climatic variability. *Rev. Geophys.* 50. <https://doi.org/10.1029/2011RG000373>
- Wu, X., Xiao, Q., Wen, J., You, D., Hueni, A., 2019. Advances in quantitative remote sensing product validation: Overview and current status. *Earth-Sci. Rev.* 196, 102875. <https://doi.org/10.1016/j.earscirev.2019.102875>
- Zeng, Y., Su, Z., Calvet, J.-C., Manninen, T., Swinnen, E., Schulz, J., Roebeling, R., Poli, P., Tan, D., Riihelä, A., Tanis, C.-M., Arslan, A.-N., Obregon, A., Kaiser-Weiss, A., John, V.O., Timmermans, W., Timmermans, J., Kaspar, F., Gregow, H., Barbu, A.-L., Fairbairn, D., Gelati, E., Meurey, C., 2015. Analysis of current validation practices in Europe for space-

- based climate data records of essential climate variables. *Int. J. Appl. Earth Obs. Geoinformation* 42, 150–161. <https://doi.org/10.1016/j.jag.2015.06.006>
- Zhang, K., Kimball, J.S., Running, S.W., 2016. A review of remote sensing based actual evapotranspiration estimation. *Wiley Interdiscip. Rev. Water* 3, 834–853. <https://doi.org/10.1002/wat2.1168>
- Zhong, L., Xu, K., Ma, Y., Huang, Z., Wang, X., Ge, N., 2019. Evapotranspiration estimation using surface energy balance system model: A case study in the Nagqu River Basin. *Atmosphere* 10, 1–13. <https://doi.org/10.3390/atmos10050268>
