# Supplementary material for: Uncertainty Assessment of Satellite Remote Sensing-based Evapotranspiration Estimates: A Systematic Review of Methods and Gaps
Source: Copernicus journal article supplement (doi:10.5194/egusphere-2023-725), 2023-04-25
Supplement: Supplementary file [file egusphere-2023-725-RC1-supplement.pdf]

This is a great paper giving an overview of remotely sensed ET evaluation approaches in the literature. It's well-written and interesting. Such an undertaking is certainly a large task so it's understandable that the authors would miss some literature here and there; I've given a few pointers to uncover large missing areas in the literature. That said, I don't know which of the 601 (plus more coming in revision) papers the authors should cite explicitly in the main text versus refer to implicitly within category, but maybe err on the side of adding more in-text references unless EGU sphere pushes back with a limit? Overall, the paper doesn't really have a main result other than that different things are different, but the paper will be a great go-to source for those interested in RS-ET. If scientists follow the recommendations, this could help understand results in a relative context.

Josh Fisher

- There is some discussion on different time scales of analysis, but perhaps some more extensive commentary on instantaneous vs. temporally upscaled validation would be helpful given that most RS-ET is based on polar orbiting instantaneous measurements.
- L31. May want to cite [Fisher et al., 2017].
- L35. May want to cite [Monteith, 1965; Shuttleworth and Wallace, 1985].
- L39. [Fisher et al., 2017].
- L49. Include ECOSTRESS [Fisher et al., 2020].
- Fig 1. This figure seems to be missing a lot of literature, including reviews cited in the text (e.g., Vinukollu; Jimenez; Melton; etc.).
- L130. "ET is not measured directly by sensors, but is the result from models or reanalyses, and thus..."
- Section 2.3. We used Gaussian Error Propagation in [Fisher et al., 2005] and Method of Moments in [Fisher et al., 2008].
- L185. Period.
- How do you draw the line between diagnostic models, machine learning models, land surface models, etc.? It's sometimes a blurry distinction.
- Figs 5 & 9. I'm not 100% clear on how to read this. It's not obvious what the top bars correspond to. The figure does not label what are the bottom numbers. It's not clear what gray vs. black circles are, and what the connecting lines mean. Maybe define TCH/TH in the caption.
- L243. Curious what are those other approaches?
- Fig 6. Maybe include a secondary y-axis that is the total #.
- Fig 7. I'm not seeing the water balance residual papers here?
- L274. Even smaller with sap flow?
- L308. Slightly misleading because then there was the GRACE-FO mission, which should be mentioned.
- Section 4.1.2. I think you're missing quite a lot of papers here, so you'll have to re-search and update.
- 4.3 out of order.

- Section 4.7. Yunjun Yao and others have been forging forward with many papers in this realm.
- Fig 12. Nice figure.
- L520. Interesting.
- L556. I think it would also depend on the site. If you're using a site with low ET, then your RMSE is likely to be low, and vice versa.
- L581. "in a"
- Section 7. One of the major approaches many of us in the community are working towards is improved spatiotemporal resolution of RS-ET. Moving from ECOSTRESS to SBG, multiple Landsats, TRISHNA, LSTM, and Hydrosat. Would that be worth commenting on here?
- L606. Period.
- L754. Reference repeated.
- Here's a list of more papers to cross-check:

[McCabe and Wood, 2006; Fisher et al., 2009; Glenn et al., 2010; Liang et al., 2010; Blyth and Harding, 2011; Fisher et al., 2011; Jiménez et al., 2011; Mueller et al., 2011; Sahoo et al., 2011; Vinukollu et al., 2011b; Vinukollu et al., 2011a; Polhamus et al., 2012; McCabe et al., 2013; Mueller et al., 2013; Polhamus et al., 2013; Armanios and Fisher, 2014; Chen et al., 2014; Ershadi et al., 2014; Yao et al., 2014; Chen et al., 2015; Feng et al., 2016; McCabe et al., 2016; Michel et al., 2016a; Michel et al., 2016b; Miralles et al., 2016a; Miralles et al., 2016b; Zhang et al., 2016; Yao et al., 2017a; Yao et al., 2017b; Chang et al., 2018; Jiménez et al., 2018; Xu et al., 2018; Gomis-Cebolla et al., 2019; Guillevic et al., 2019; McCabe et al., 2019; Stoy et al., 2019; Pascolini-Campbell et al., 2020; Sadeghi et al., 2020; Wu et al., 2020; Anderson et al., 2021; Bai et al., 2021; Cawse-Nicholson et al., 2021; Melo et al., 2021; Pascolini-Campbell et al., 2021; Pascolini-Campbell et al., 2021; Shang et al., 2021; Tang et al., 2021; Shi et al., 2022; Xie et al., 2022; Yang et al., 2022; Volk et al., 2023]

- Anderson, M. C., Y. Yang, J. Xue, K. R. Knipper, Y. Yang, F. Gao, C. R. Hain, W. P. Kustas, K. Cawse-Nicholson, and G. Hulley (2021), Interoperability of ECOSTRESS and Landsat for mapping evapotranspiration time series at sub-field scales, *Remote Sensing of Environment*, 252, 112189.
- Armanios, D. E., and J. B. Fisher (2014), Measuring water availability with limited ground data: assessing the feasibility of an entirely remote-sensing-based hydrologic budget of the Rufiji Basin, Tanzania, using TRMM, GRACE, MODIS, SRB, and AIRS, *Hydrological Processes*, 28(3), 853-867.
- Bai, Y., S. Zhang, N. Bhattarai, K. Mallick, Q. Liu, L. Tang, J. Im, L. Guo, and J. Zhang (2021), On the use of machine learning based ensemble approaches to improve evapotranspiration estimates from croplands across a wide environmental gradient, *Agricultural and Forest Meteorology*, 298, 108308.
- Blyth, E., and R. J. Harding (2011), Methods to separate observed global evapotranspiration into the interception, transpiration and soil surface evaporation components, *Hydrological Processes*, 25(26), 4063-4068.
- Cawse-Nicholson, K., M. C. Anderson, Y. Yang, Y. Yang, S. J. Hook, J. B. Fisher, G. Halverson, G. C. Hulley, C. Hain, and D. D. Baldocchi (2021), Evaluation of a CONUS-wide ECOSTRESS DisALEXI evapotranspiration product, *IEEE Journal of Selected Topics in Applied Earth Observations and Remote Sensing*, 14, 10117-10133.
- Chang, Y., D. Qin, Y. Ding, Q. Zhao, and S. Zhang (2018), A modified MOD16 algorithm to estimate evapotranspiration over alpine meadow on the Tibetan Plateau, China, *Journal of Hydrology*, 561, 16-30.
- Chen, Y., J. Xia, S. Liang, J. Feng, J. B. Fisher, X. Li, X. Li, S. Liu, Z. Ma, and A. Miyata (2014), Comparison of satellite-based evapotranspiration models over terrestrial ecosystems in China, *Remote Sensing of Environment*, 140, 279-293.
- Chen, Y., W. Yuan, J. Xia, J. B. Fisher, W. Dong, X. Zhang, S. Liang, A. Ye, W. Cai, and J. Feng (2015), Using Bayesian model averaging to estimate terrestrial evapotranspiration in China, *Journal of Hydrology*, 528, 537-549.
- Ershadi, A., M. F. McCabe, J. P. Evans, N. W. Chaney, and E. F. Wood (2014), Multi-site evaluation of terrestrial evaporation models using FLUXNET data, *Agricultural and Forest Meteorology*, 187, 46-61.
- Feng, F., X. Li, Y. Yao, S. Liang, J. Chen, X. Zhao, K. Jia, K. Pinter, and J. H. McCaughey (2016), An empirical orthogonal function-based algorithm for estimating terrestrial latent heat flux from eddy covariance, meteorological and satellite observations, *Plos one*, 11(7).
- Fisher, J. B., K. Tu, and D. D. Baldocchi (2008), Global estimates of the land-atmosphere water flux based on monthly AVHRR and ISLSCP-II data, validated at 16 FLUXNET sites, *Remote Sensing of Environment*, 112(3), 901-919.
- Fisher, J. B., R. H. Whittaker, and Y. Malhi (2011), ET Come Home: A critical evaluation of the use of evapotranspiration in geographical ecology, *Global Ecology and Biogeography*, 20, 1-18.
- Fisher, J. B., T. A. Debiase, Y. Qi, M. Xu, and A. H. Goldstein (2005), Evapotranspiration models compared on a Sierra Nevada forest ecosystem, *Environmental Modelling & Software*, 20(6), 783-796.

- Fisher, J. B., F. Melton, E. Middleton, C. Hain, M. Anderson, R. Allen, M. F. McCabe, S. Hook, D. Baldocchi, and P. A. Townsend (2017), The future of evapotranspiration: Global requirements for ecosystem functioning, carbon and climate feedbacks, agricultural management, and water resources, *Water Resources Research*, 53(4), 2618-2626.
- Fisher, J. B., et al. (2009), The land-atmosphere water flux in the tropics, *Global Change Biology*, 15, 2694-2714.
- Fisher, J. B., et al. (2020), ECOSTRESS: NASA's Next Generation Mission to Measure Evapotranspiration From the International Space Station, *Water Resources Research*, 56(4), e2019WR026058.
- Glenn, E., P. Nagler, and A. Huete (2010), Vegetation Index methods for estimating evapotranspiration by remote sensing, *Surveys in Geophysics*, 31(6), 531-555.
- Gomis-Cebolla, J., J. C. Jimenez, J. A. Sobrino, C. Corbari, and M. Mancini (2019), Intercomparison of remote-sensing based evapotranspiration algorithms over amazonian forests, *International Journal of Applied Earth Observation and Geoinformation*, 80, 280-294.
- Guillevic, P. C., A. Olioso, S. J. Hook, J. B. Fisher, J.-P. Lagouarde, and E. F. Vermote (2019), Impact of the revisit of thermal infrared remote sensing observations on evapotranspiration uncertainty—A sensitivity study using AmeriFlux Data, *Remote Sensing*, 11(5), 573.
- Jiménez, C., B. Martens, D. M. Miralles, J. B. Fisher, H. E. Beck, and D. Fernández-Prieto (2018), Exploring the merging of the global land evaporation WACMOS-ET products based on local tower measurements, *Hydrology and Earth System Sciences*, 22(8), 4513-4533.
- Jiménez, C., et al. (2011), Global inter-comparison of 12 land surface heat flux estimates, *Journal of Geophysical Research*, 116(D02102), doi:10.1029/2010JD014545.
- Liang, S., K. Wang, X. Zhang, and Wild, Martin (2010), Review on estimation of land surface radiation and energy budgets from ground measurement, remote sensing and model simulations, *IEEE Journal of Selected Topics in Applied Earth Observations and Remote Sensing*, 3(3), 225-240.
- McCabe, M., et al. (2013), Global-scale estimation of land surface heat fluxes from space: product assessment and intercomparison, in *Remote Sensing of Energy Fluxes and Soil Moisture Content*, edited by G. P. Petropoulos, p. 538, CRC Press, Taylor & Francis Group.
- McCabe, M. F., and E. F. Wood (2006), Scale influences on the remote estimation of evapotranspiration using multiple satellite sensors, *Remote Sensing of Environment*, 105(4), 271-285.
- McCabe, M. F., D. G. Miralles, T. R. Holmes, and J. B. Fisher (2019), Advances in the remote sensing of terrestrial evaporation, edited, p. 1138, MDPI.
- McCabe, M. F., A. Ershadi, C. Jimenez, D. G. Miralles, D. Michel, and E. F. Wood (2016), The GEWEX LandFlux project: evaluation of model evaporation using tower-based and globally gridded forcing data, *Geoscientific Model Development*, 9(1), 283-305.
- Melo, D., J. Anache, V. Borges, D. Miralles, B. Martens, J. Fisher, R. Nóbrega, A. Moreno, O. Cabral, and T. Rodrigues (2021), Are remote sensing evapotranspiration models reliable across South American ecoregions?, *Water Resources Research*, 57(11), 1-23.
- Michel, D., C. Jiménez, D. Miralles, M. Jung, M. Hirschi, A. Ershadi, B. Martens, M. McCabe, J. Fisher, and Q. Mu (2016a), TheWACMOS-ET project—Part 1: Tower-scale evaluation of four remote-sensing-based evapotranspiration algorithms, *Hydrology and Earth System Sciences*, 20(2), 803-822.

- Michel, D., C. Jiménez, D. G. Miralles, M. Jung, M. Hirschi, A. Ershadi, B. Martens, M. F. McCabe, J. B. Fisher, and Q. Mu (2016b), The WACMOS-ET project—Part 1: Tower-scale evaluation of four remote-sensing-based evapotranspiration algorithms, *Hydrology and Earth System Sciences*, 20(2), 803-822.
- Miralles, D., C. Jiménez, M. Jung, D. Michel, A. Ershadi, M. McCabe, M. Hirschi, B. Martens, A. Dolman, and J. Fisher (2016a), The WACMOS-ET project, part 2: evaluation of global terrestrial evaporation data sets, *Hydrology and Earth System Sciences*, 20(2), 823-842.
- Miralles, D. G., C. Jiménez, M. Jung, D. Michel, A. Ershadi, M. McCabe, M. Hirschi, B. Martens, A. J. Dolman, and J. B. Fisher (2016b), The WACMOS-ET project—Part 2: Evaluation of global terrestrial evaporation data sets, *Hydrology and Earth System Sciences*, 20(2), 823-842.
- Monteith, J. L. (1965), Evaporation and the environment, *Symposium of the Society of Exploratory Biology*, 19, 205-234.
- Mueller, B., M. Hirschi, C. Jimenez, P. Ciais, P. Dirmeyer, A. Dolman, J. Fisher, M. Jung, F. Ludwig, and F. Maignan (2013), Benchmark products for land evapotranspiration: LandFlux-EVAL multi-dataset synthesis, *Hydrology & Earth System Sciences*, 17, 3707-3720.
- Mueller, B., et al. (2011), Evaluation of global observations-based evapotranspiration datasets and IPCC AR4 simulations, *Geophysical Research Letters*, 38(L06402), doi:10.1029/2010GL046230.
- Pascolini-Campbell, M., J. T. Reager, H. A. Chandanpurkar, and M. Rodell (2021), A 10 per cent increase in global land evapotranspiration from 2003 to 2019, *Nature*, 593(7860), 543-547.
- Pascolini-Campbell, M., J. B. Fisher, and J. T. Reager (2021), GRACE-FO and ECOSTRESS synergies constrain fine-scale impacts on the water balance, *Geophysical Research Letters*, 48(15), e2021GL093984.
- Pascolini-Campbell, M. A., J. T. Reager, and J. B. Fisher (2020), GRACE-based mass conservation as a validation target for basin-scale evapotranspiration in the contiguous United States, *Water Resources Research*, 56(2), e2019WR026594.
- Polhamus, A., J. B. Fisher, and K. P. Tu (2012), What controls the error structure in evapotranspiration models?, *Agricultural and Forest Meteorology*, 169, 12-24.
- Polhamus, A., J. B. Fisher, and K. P. Tu (2013), What controls the error structure in evapotranspiration models?, *Agricultural and Forest Meteorology*, 169, 12-24.
- Sadeghi, M., A. Ebtehaj, W. T. Crow, L. Gao, A. J. Purdy, J. B. Fisher, S. B. Jones, E. Babaeian, and M. Tuller (2020), Global estimates of land surface water fluxes from SMOS and SMAP satellite soil moisture data, *Journal of Hydrometeorology*, 21(2), 241-253.
- Sahoo, A. K., M. Pan, T. J. Troy, R. K. Vinukollu, J. Sheffield, and E. F. Wood (2011), Reconciling the global terrestrial water budget using satellite remote sensing, *Remote Sensing of Environment*, 115(8), 1850-1865.
- Shang, K., Y. Yao, S. Liang, Y. Zhang, J. B. Fisher, J. Chen, S. Liu, Z. Xu, Y. Zhang, and K. Jia (2021), DNN-MET: A deep neural networks method to integrate satellite-derived evapotranspiration products, eddy covariance observations and ancillary information, *Agricultural and Forest Meteorology*, 308, 108582.
- Shi, M., J. R. Worden, A. Bailey, D. Noone, C. Risi, R. Fu, S. Worden, R. Herman, V. Payne, and T. Pagano (2022), Amazonian terrestrial water balance inferred from satellite-observed water vapor isotopes, *Nature Communications*, 13(1), 2686.

- Shuttleworth, W. J., and J. S. Wallace (1985), Evaporation from sparse crops—an energy combination theory, *Quarterly Journal of the Royal Meteorological Society*, *111*, 839-855.
- Stoy, P. C., T. S. El-Madany, J. B. Fisher, P. Gentine, T. Gerken, S. P. Good, A. Klosterhalfen, S. Liu, D. G. Miralles, and O. Perez-Priego (2019), Reviews and syntheses: Turning the challenges of partitioning ecosystem evaporation and transpiration into opportunities, *Biogeosciences*, *16*(19), 3747-3775.
- Tang, L., S. Zhang, J. Zhang, Y. Liu, and Y. Bai (2021), Estimating evapotranspiration based on the satellite-retrieved near-infrared reflectance of vegetation (NIRv) over croplands, *GIScience & Remote Sensing*, 1-25.
- Vinukollu, R. K., E. F. Wood, C. R. Ferguson, and J. B. Fisher (2011a), Global estimates of evapotranspiration for climate studies using multi-sensor remote sensing data: Evaluation of three process-based approaches, *Remote Sensing of Environment*, *115*, 801-823.
- Vinukollu, R. K., R. Meynadier, J. Sheffield, and E. F. Wood (2011b), Multi-model, multi-sensor estimates of global evapotranspiration: climatology, uncertainties and trends, *Hydrological Processes*, *25*(26), 3993-4010.
- Volk, J. M., J. Huntington, F. S. Melton, R. Allen, M. C. Anderson, J. B. Fisher, A. Kilic, G. Senay, G. Halverson, and K. Knipper (2023), Development of a benchmark Eddy flux evapotranspiration dataset for evaluation of satellite-driven evapotranspiration models over the CONUS, *Agricultural and Forest Meteorology*, *331*, 109307.
- Wu, G., X. Cai, T. F. Keenan, S. Li, X. Luo, J. B. Fisher, R. Cao, F. Li, A. J. Purdy, and W. Zhao (2020), Evaluating three evapotranspiration estimates from model of different complexity over China using the ILAMB benchmarking system, *Journal of Hydrology*, *590*, 125553.
- Xie, Z., Y. Yao, X. Zhang, S. Liang, J. B. Fisher, J. Chen, K. Jia, K. Shang, J. Yang, and R. Yu (2022), The Global LAnd Surface Satellite (GLASS) evapotranspiration product Version 5.0: Algorithm development and preliminary validation, *Journal of Hydrology*, *610*, 127990.
- Xu, J., Y. Yao, S. Liang, S. Liu, J. B. Fisher, K. Jia, X. Zhang, Y. Lin, L. Zhang, and X. Chen (2018), Merging the MODIS and landsat terrestrial latent heat flux products using the multiresolution tree method, *IEEE Transactions on Geoscience and Remote Sensing*, *57*(5), 2811-2823.
- Yang, J., Y. Yao, C. Shao, Y. Li, J. B. Fisher, J. Cheng, J. Chen, K. Jia, X. Zhang, and K. Shang (2022), A novel TIR-derived three-source energy balance model for estimating daily latent heat flux in mainland China using an all-weather land surface temperature product, *Agricultural and Forest Meteorology*, *323*, 109066.
- Yao, Y., S. Liang, X. Li, Y. Hong, J. B. Fisher, N. Zhang, J. Chen, J. Cheng, S. Zhao, and X. Zhang (2014), Bayesian multimodel estimation of global terrestrial latent heat flux from eddy covariance, meteorological, and satellite observations, *Journal of Geophysical Research: Atmospheres*, *119*(8), 4521-4545.
- Yao, Y., S. Liang, X. Li, J. Chen, S. Liu, K. Jia, X. Zhang, Z. Xiao, J. B. Fisher, and Q. Mu (2017a), Improving global terrestrial evapotranspiration estimation using support vector machine by integrating three process-based algorithms, *Agricultural and Forest Meteorology*, *242*, 55-74.
- Yao, Y., S. Liang, X. Li, Y. Zhang, J. Chen, K. Jia, X. Zhang, J. B. Fisher, X. Wang, and L. Zhang (2017b), Estimation of high-resolution terrestrial evapotranspiration from Landsat data using a simple Taylor skill fusion method, *Journal of Hydrology*, *553*, 508-526.

Zhang, Y., M. Pan, and E. F. Wood (2016), On creating global gridded terrestrial water budget estimates from satellite remote sensing, in *Remote Sensing and Water Resources*, edited, pp. 59-78, Springer.
